# Supplementary material for: FOREST protocol: a qualitative study exploring health and sexuality of transmasculine individuals in France
Source: HighWire-hosted journal article supplement (doi:10.1136/bmjopen-2021-052748), 2021-11-01
Supplement: bmjopen-2021-052748supp002_data_supplement.pdf [file bmjopen-2021-052748supp002_data_supplement.pdf]

|                                                                                   |                                                                                      |                                                                                                                                                                        |
|-----------------------------------------------------------------------------------|--------------------------------------------------------------------------------------|------------------------------------------------------------------------------------------------------------------------------------------------------------------------|
|  | <b>FOREST</b><br><b>Health and Sexuality of Transmasculine</b><br><b>Individuals</b> | Version 1<br>25/03/2021                                                                                                                                                |
| <b>TRICON</b><br>Disclosure policy                                                |                                                                                      |                                                                                                                                                                        |
|  |     |   |

### TRICON framework:

Transparency and informed, voluntary participation are especially important for trans health research because of a long history of intolerance, bias, and psycho-pathological stereotyping in this specialty. On matters of human oppression, historical context matters. Answering these questions will provide opportunity for more positive exposure to affirming, high-quality research projects, and it will provide opportunity for trans individuals to give a more informed consent to participate in them. These questions can be considered by all who are interested in doing research with trans people.

The Transgender Research Informed Consent (TRICON) Disclosure Policy by Kelley Winters, Antonia Elle D'orsay, & Vreer Sirenu, administrators of the International Transgender Health Forum, is licensed under Creative Commons, CC BY 4.0. They encourage all institutions conducting research on transgender and gender-diverse populations and all organizations that serve trans communities to adopt the TRICON disclosure policy, with CC attribution to the original authors.

### **1. What is the specific objective of the study and its intended impact on future trans lives?**

This project aims to investigate the functions and representations of transmasculine individuals, including their relationship to HIV and other sexually transmitted infections. Hence, it will document and improve their sexual health through scientifically reliable data. Such data will allow to grasp the interaction and nuances of living conditions, socio-economic status and transmasculine people's concerns with regard to their health. The adequacy between the healthcare needs and access will be questioned and the results of the study will contribute to improve transmasculine people's health. Furthermore, this project will favor the empowerment of a community-based organization through knowledge and skills transfer.

### **2. Who is the principal investigator?**

Pr Marie Préau, GRePS research lab, Université Lumière Lyon 2.

### **3. What are the sponsoring institutions or organizations?**

This project involve two teams. On one hand, OUTrans, a community-based organization in support of transgender people, for which Jules Gasté will act as representant of the team. On the other hand, Dr Marie Préau will be leading the research lab GRePS (Research Group in Social Psychology) from Lyon 2 University.

#### 4. How are trans scholars/researchers included in this research work?

Several trans researchers are included in the scientific council. These people, recognized for their skills and expertise, guarantee the transparency and scientific quality of the project. In addition, the research Steering Committee is made up equally of members of the GRePS research lab and members of the OUtans community-based organization. In total, more than 50% of the people involved in the research team (scientific council + steering committee) are transgender (7/14 individuals).

Moreover, this research adopts the principles of community-based research. The concerned people, notably represented by the community-based organization, are involved in all stages of the research. This, from the drafting of the protocol to the valorization of the results.

#### 5. Who is funding the study? Describe any conflicts of interest.

This research is funded by ANRS - Emerging Infectious Diseases, grant number 20365 FOREST. Individuals involved in the research team do not declare any conflict of interest.

#### 6. Is there IRB/Ethics board approval? Describe ethical practices specific to trans subjects

This research received a favorable opinion from the CEEI/IRB of Inserm (IRB00003888) in September 15<sup>th</sup> 2020. In addition, the protocol will be published in order to ensure its ethical and methodological evaluation and to guarantee the transparency of the research process.

Following the recommendations of the InSHS of the CNRS, the data will be pseudonymized for data exploitation, then anonymized upon publication.

An information notice recalling the rights of individuals will be systematically provided before the interviews are conducted.

As it concerns intimate life interviews, we will ensure that they take place in an atmosphere of trust, respect and consideration for possible subjects that may cause discomfort to the participants.

#### 7. What is the target study population? Describe geographic scope, languages, and intersectional inclusion.

This research aims to interview transmasculine people on the one hand and on the other hand key informants about the health care of transmasculine people. People will be solicited throughout France, and the interviewees must reside in France.

We will diversify the possibilities of data collection by offering people either a face-to-face interview, or a remote interview in order to compensate for situations of too great a geographical distance, problems of mobility or restrictions linked to the sanitary context.

We wish to gather a diversity of points of view and potential forms of oppression. We will be vigilant in ensuring that different backgrounds are represented in our sample and will implement a recruitment strategy that allows the greatest number of people to participate.

#### 8. Is there a cost or travel requirement, or is there compensation for participants?

Interview trips will be made by the members of the research team in charge of the data collection. This, in order to limit the travel burden for the interviewees.

This research does not require any expenses on the part of the participants. Participation is on a voluntary basis and does not entitle participants to financial compensation.

### 9. Will the results of this research be published in open access journals or channels?

The publishing strategy will favor journals offering free access to their articles.

This research will result in several open access publications (scientific but also for the general public) and a brochure presenting the results. Finally, an open access video will summarize the main issues and discoveries.

All participants will be invited to provide a personal (non-identifying) contact for the dissemination of the study results and will be invited to participate in the results communications.
